# Supplementary material for: Identification of Hypoxia Prognostic Signature in Glioblastoma Multiforme Based on Bulk and Single-Cell RNA-Seq
Source: Cancers (Basel). 2024 Feb 1;16(3):633. doi: 10.3390/cancers16030633 (PMC10854729; doi:10.3390/cancers16030633)
Supplement: Supplementary file 1 [file cancers-16-00633-s001.zip › Supplementary Table S1.xlsx]

## Sheet: Sheet1
Genes related to hypoxia
ABCB1
ACAT1
PLIN2
ADM
ADORA2B
AK2
AK3
ALDH1A1
ALDH1A3
ALDOA
ALDOC
ANGPT2
ANGPTL4
ANXA1
ANXA2
ANXA5
ARHGAP5
ARSL
ART1
BACE2
BCL2L1
BCL2L2
BHLHE40
BHLHE41
BIK
BIRC2
BNIP3
BNIP3L
BPI
BTG1
VPS51
CA12
CA9
CALD1
CCNG2
CCT6A
CD99
CDK1
CDKN1A
CDKN1B
CITED2
CLK1
CNOT7
COL4A5
COL5A1
COL5A2
COL5A3
CP
CTSD
CXCR4
NSG1
DDIT3
DDIT4
EIF4A3
DELEC1
DKC1
DR1
EDN1
EDN2
EFNA1
EGF
EGR1
ELF3
ELL2
ENG
ENO1
ENO3
ENPEP
EPO
ETS1
F3
FABP5
FGF3
FKBP4
FLT1
FN1
FOS
FTL
XRCC6
GAPDH
GBE1
GLRX
GPI
HAP1
HBP1
HDAC1
HDAC9
HERC3
HERPUD1
HGF
HIF1A
HILPDA
HK1
HK2
HLA-DQB1
HMOX1
HMOX2
HSPA5
HSPD1
HSPH1
HYOU1
ICAM1
ID2
IFI27
IGF2
IGFBP1
IGFBP2
IGFBP3
IGFBP5
IL6
CXCL8
INSIG1
IRF6
ITGA5
JUN
KDR
KRT14
KRT18
KRT19
LDHA
LDHB
LEP
LGALS1
LOX
LRP1
MAP4
MET
MIF
ERRFI1
MMP13
MMP2
MMP7
MPI
MT-CO1
MT-CO2
MT1L
MTL3P
MUC1
MXI1
NDRG1
NFIL3
NFKB1
NFKB2
NOS1
NOS2
NOS2P2
NOS2P1
NOS3
PNP
NR3C1
NR4A1
NT5E
ODC1
P4HA1
P4HA2
PAICS
PDGFB
PDK3
PFKFB1
PFKFB3
PFKFB4
PFKL
PGAM1
PGF
PGK1
PGK2
PGM1
PIM1
PIM2
PKM
PLAU
PLAUR
PLOD2
PNN
POLM
PPARA
PPAT
PROK1
LONP1
PSMA3
PSMD9
PTGS1
PTGS2
SIRPA
QSOX1
RBPJ
RELA
RIOK3
RNASEL
RRP9
RPL36A
SGSM2
SAT1
SERPINB2
SERPINE1
SRSF6
SIAH2
SIN3A
SLC16A1
SLC16A2
SLC20A1
SLC2A1
SLC2A3
SLC3A2
SLC6A10P
SLC6A16
SLC6A6
SLC6A8
BATF3
SORL1
SPP1
ZNRD2
STC2
BHLHE40
SYT7
TBPL1
TCEAL1
TEK
TF
TFF3
TFRC
TGFA
TGFB1
TGFB3
TGFBI
TGM2
TH
THBS1
THBS2
TIMM17A
TNFAIP3
TP53
TPBG
TPD52
TPI1
HSP90B1
TXN
TXNIP
UMPS
VEGFA
VEGFB
VEGFC
VIM
VPS11
