# Supplementary material for: Identification of Hypoxia Prognostic Signature in Glioblastoma Multiforme Based on Bulk and Single-Cell RNA-Seq
Source: Cancers (Basel). 2024 Feb 1;16(3):633. doi: 10.3390/cancers16030633 (PMC10854729; doi:10.3390/cancers16030633)
Supplement: Supplementary file 1 [file cancers-16-00633-s001.zip › Supplementary Table S2.xlsx]

## Sheet: Supplementary Table S2
Hypoxia-related DEGs
ADM
ANGPT2
ANXA1
ANXA2
ANXA5
CA12
CALD1
CD99
CDK1
COL5A2
CP
CXCR4
DDIT4
DKC1
ENPEP
ETS1
FN1
HILPDA
HLA-DQB1
HMOX1
IGFBP2
IGFBP3
IGFBP5
ITGA5
LGALS1
LOX
MAP4
MMP2
MUC1
NOS1
PGF
PLAU
PLOD2
SERPINE1
STC2
SYT7
TF
TGFBI
TP53
VEGFA
VIM
